# Supplementary material for: Enhancing the performance of LARP-synthesized CsPbBr3 nanocrystal LEDs by employing a dual hole injection layer
Source: Royal Society of Chemistry journal article supplement (doi:10.1039/d0ra02622k), 2020-01-01
Supplement: d0ra02622k1.pdf [file d0ra02622k1.pdf]

## Supplementary Information

### Enhancing the performance of LARP-synthesized CsPbBr<sub>3</sub> nanocrystal LEDs by employing a dual hole injection layer

Dingyan Xu<sup>a</sup>, Qun Wan<sup>b</sup>, Siyao Wu<sup>a</sup>, Yu Zhao<sup>a</sup>, Xinglei Xu<sup>a</sup>, Liang Li<sup>b</sup>, and Gufeng He<sup>a\*</sup>

<sup>a</sup>National Engineering Lab for TFT-LCD Materials and Technologies, Department of Electronic Engineering, Shanghai Jiao Tong University, Shanghai 200240, People's Republic of China

<sup>b</sup>School of Environmental Science and Engineering, Shanghai Jiao Tong University, Shanghai 200240, People's Republic of China

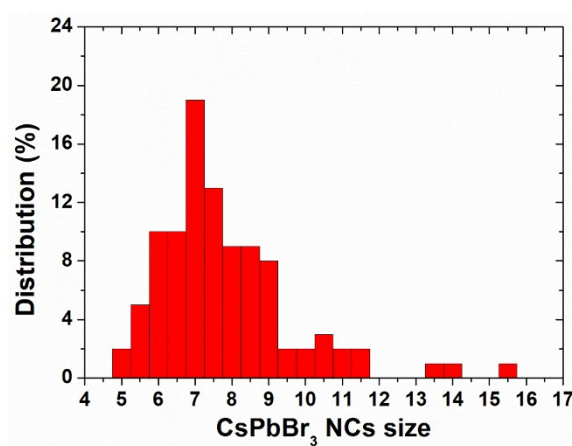

Fig. S1 histogram of size distribution for CsPbBr<sub>3</sub> NCs.

\*E-mail: [gufenghe@sjtu.edu.cn](mailto:gufenghe@sjtu.edu.cn)

Table S2 Performances of CsPbBr<sub>3</sub> NCs LEDs with different HIL.

| Device | V <sub>on</sub> <sup>a</sup><br>(V) | L <sub>max</sub><br>(cd/m <sup>2</sup> ) | CE <sub>max</sub><br>(cd/A) | PE <sub>max</sub><br>(lm/W) | EQE <sub>max</sub><br>(%) |
|--------|-------------------------------------|------------------------------------------|-----------------------------|-----------------------------|---------------------------|
| A/B/D  | - <sup>b</sup>                      | -                                        | -                           | -                           | -                         |
| C      | 2.6                                 | 324.7                                    | 0.15                        | 0.10                        | 0.11                      |
| E      | 2.3                                 | 313.8                                    | 0.22                        | 0.17                        | 0.17                      |
| F      | 2.3                                 | 332.9                                    | 0.23                        | 0.18                        | 0.18                      |

<sup>a</sup>V<sub>on</sub> is defined as the voltage at 1 cd/m<sup>2</sup>.

<sup>b</sup>"-" indicates no light emission

Table S1 Summary of the bi-exponential fitting results for PL lifetime curve of CsPbBr<sub>3</sub> NCs film.

| τ <sub>ave</sub> (ns) | A <sub>1</sub> | τ <sub>1</sub> (ns) | A <sub>2</sub> | τ <sub>2</sub> (ns) |
|-----------------------|----------------|---------------------|----------------|---------------------|
| 9.3                   | 0.682          | 5.1                 | 0.318          | 18.3                |

The decay curve is fitted to bi-exponential decay functions of time (t):

$$A = A_1 e^{-\frac{t}{\tau_1}} + A_2 e^{-\frac{t}{\tau_2}} \quad (1)$$

Where A is the normalized PL intensity, A<sub>1</sub> and A<sub>2</sub> are the fractions of the two decay components, and τ<sub>1</sub> represents the nonradiative recombination of initial photo-induced excitons through trapping states and τ<sub>2</sub> indicates the bimolecularly radiative recombination of carriers. The average lifetime (τ<sub>ave</sub>) was calculated with A<sub>1</sub>, A<sub>2</sub>, τ<sub>1</sub> and τ<sub>2</sub> according to the following equation:

$$\tau_{ave} = A_1 \tau_1 + A_2 \tau_2 \quad (2)$$
